# Supplementary material for: Challenges in radiobiological modeling: can we decide between LQ and LQ-L models based on reviewed clinical NSCLC treatment outcome data?
Source: Springer Nature journal article supplement (doi:10.1186/s13014-016-0643-5), 2016-05-06
Supplement: MOESM1 [file 10111640]

Details of the search made in PubMed (July 2015):

(early stage[Title] OR early-stage[Title] OR stage I[Title] OR stage II[Title]) AND (non-small cell lung cancer[Title] OR non-small-cell lung cancer[Title] OR non-small cell lung cancer[Title] OR NSCLC[Title] OR lung cancer[Title] OR lung tumors[Title] OR lung tumor[Title] OR lung carcinoma[Title]) AND (radiother\*[Title] OR SBRT[Title] OR stereotactic[Title] OR irradiation[Title] OR radiation[Title])

Number of records identified through database searching: 441

Number of records after duplicates removed: 441

Number of records screened: 441

Number of records excluded:  $441 - 192 = 249$

Number of full-text articles assessed for eligibility: 192

Number of full-text articles excluded, with reasons:  $192 - 31 = 161$  did not fulfill the selection criteria

Number of additional records identified through other sources: Four files found: Hamamoto12 , Onimaru03 , Takeda12 , Takeda13.

Number of studies included in this quantitative analysis: 31 studies, 8 3DCRT + 23 SBRT.

Table 1: Detailed characteristics of included studies with conventionally fractionated treatment schedules

| Reference     | Tumor Stage                         | No. Pats                 | Histology                                                                       | Location     | Schedule, Total Treatment Time Prescription                                                     | Total Dose at isocenter [Gy] | Volume Definition                                                                                             | LC [%]                   | CSS [%]          | OS [%]                   | FU median (range) [m]     |
|---------------|-------------------------------------|--------------------------|---------------------------------------------------------------------------------|--------------|-------------------------------------------------------------------------------------------------|------------------------------|---------------------------------------------------------------------------------------------------------------|--------------------------|------------------|--------------------------|---------------------------|
| Kaskowitz     | stage IA/IB<br>20 T1 - 33 T2,<br>N0 | 53                       | 11 ade, 32 scc,<br>4 lc, 6 nos                                                  | ns           | median 63 (40 - 80) Gy, conv.<br>fractionation, dose point not specified                        | 63 <sup>s</sup>              | target: tumor + 1.5 cm (estimated from port films),<br>elective nodal RT                                      | 3y: 51<br>5y: 51         | 3y: 33<br>5y: 13 | 3y: 19<br>5y: 6          | ns                        |
| Jeremic       | stage IA/IB<br>25 T1 - 24 T2,<br>N0 | 49                       | 18 ade, 23 scc,<br>7 lc, 1 nos                                                  | 25 p<br>24 c | 69.6 Gy in 1.2 Gy/f (twice a day),<br>40 days, to isocenter                                     | 70                           | PTV: tumor + ipsilateral hilus + 2 cm                                                                         | 3y: 55<br>5y: 55         |                  | 3y: 47<br>5y: 30         | ns                        |
| Hayakawa      | stage IA/IB<br>7 T1 - 29 T2,<br>N0  | 36                       | 16 ade, 19 scc,<br>1 lc                                                         | p            | 60 - 81 Gy in 2 Gy/f, 48 days,<br>to isocenter                                                  | 67 <sup>s</sup>              | target not specified,<br>28 % patients elective nodal RT to 38 - 50 Gy                                        | 3y: 72<br>5y: 72         | 3y: 56<br>5y: 39 | 3y: 42<br>5y: 23         | (36 - 216)                |
| Cheung        | stage IA/IB<br>18 T1 - 15 T2,<br>N0 | 33                       | 10 ade, 13 scc,<br>5 lc, 5 nos                                                  | 27 p<br>6 c  | 48 Gy in 4 Gy/f, maximum 3 weeks,<br>to isocenter                                               | 48                           | target: GTV + 1 - 1.5 cm,<br>no elective nodal RT                                                             | 3y: 63                   | 3y: 36           | 3y: 32                   | 23 <sup>&amp;</sup>       |
| Langendijk    | stage IA/IB<br>26 T1 - 20 T2,<br>N0 | 46                       | 2 ade, 23 scc,<br>10 undiff, 11<br>unknown                                      | 37 p<br>9 c  | 70 Gy in 2 Gy/f, 7 weeks<br>to isocenter, Dmin(PTV)= 90 %                                       | 70                           | CTV: GTV + 1.5 cm; PTV <sub>46Gy</sub> : CTV + 0.5 cm,<br>PTV <sub>70Gy</sub> : GTV + 1 cm; elective nodal RT | 3y: 50                   |                  | 3y: 22                   | 36 <sup>&amp;</sup>       |
| Bradley       | stage IA/IB<br>31 T1 - 25 T2,<br>N0 | 56                       | 14 ade, 25 scc,<br>6 lc, 11 nos                                                 | p            | 60 - 84 Gy in 1.8 - 2 Gy/f, 6 - 8 weeks<br>to isocenter                                         | 70 <sup>s</sup>              | PTV: GTV + 1 cm (increased if tumor moved) 39 %<br>patients elective nodal RT                                 | 3y: 63                   | 3y: 51           | 3y: 34                   | 20<br>(6 - 72)            |
| Bogart        | stage IA/IB<br>19 T1 - 12 T2,<br>N0 | 31                       | 9 ade, 8 scc,<br>1 lc, 13 nos                                                   | ns           | median 70 Gy in 2.25 - 3.7 Gy/f,<br>5.5 weeks, 95 % dose covering PTV                           | 70 <sup>s</sup>              | PTV: GTV + 1 - 1.5 cm (increased if tumor moved),<br>no elective nodal RT                                     | 3y: 83<br>5y: 83         |                  | 3y: 64<br>5y: 19         | 29 <sup>&amp;</sup>       |
| Zehentmayr    | stage I                             | 40<br>+14<br>stage<br>II | 16 ade, 33 scc, 7<br>nos* 14 stage II<br>reported<br>together, but not<br>in LC | 36 p<br>2 c  | Median 79.2 (73.8-90.4) Gy in 1.8 Gy/f<br>twice daily in 2-3 weeks, dose point not<br>specified | 79                           | Slow CT, PTV: GTV + 7mm                                                                                       | 3y: 91                   |                  |                          | 28.5 (2-108)              |
| <b>Median</b> |                                     | <b>43</b>                |                                                                                 |              |                                                                                                 | <b>70</b>                    |                                                                                                               | <b>3y: 63<br/>5y: 72</b> | <b>3y: 43.5</b>  | <b>3y: 34<br/>5y: 21</b> | <b>28.5<br/>(2 - 216)</b> |

FU: follow-up, §: mean value, \$: median value, ade: adenocarcinoma, scc: squamous cell carcinoma, ba: bronchio-alveolar, lc: large cell carcinoma, nos: not otherwise specified, undiff: undifferentiated, non-scc: non-squamous cell carcinoma, ns: not specified, &: pats alive at the end of follow up, p: peripheral, c: central.

Kaskowitz: 54% of total patients received total doses between 60 and 70 Gy, with a median difference in total treatment time of 5 days, the maximal difference was 28 days. Hayakawa: Standard deviation of 7 Gy in the total dose and 8 days in total treatment time.

Cheung: included 4 patients with N1. Bradley: A majority of patients (42%) were receiving between 70 and 83 Gy. Bogart: Total doses range from 60 to 80 Gy, "most frequently 70 Gy" (sic).

Table 2: Detailed summary of hypofractionated data.

| Reference   | Tumor Stage                         | No Pats | Histology                                  | Location     | Schedule, Total Treatment Time Prescription                                      | Total Dose at isocenter [Gy] | Volume definition                                                               | LC [%]           | CSS [%]          | OS [%]           | FU median (range) [m]       |
|-------------|-------------------------------------|---------|--------------------------------------------|--------------|----------------------------------------------------------------------------------|------------------------------|---------------------------------------------------------------------------------|------------------|------------------|------------------|-----------------------------|
| Onimaru '03 | stage IA/IB<br>17 T1 - 8 T2, N0     | 25      | 14 ade, 8 scc,<br>3 nos                    | p            | 48 Gy in 6 Gy/f or 60 Gy in 7.5/f, 2 weeks, to isocenter, Dmin(PTV) = 80 %       | 48 <sup>s</sup>              | CTV = GTV, ITV: CTV in free breathing, exhale, and inhale, PTV: ITV+ 0.5 cm     | 3y: 55           | 2y: 60           | 2y: 47           | 18<br>(2-44) <sup>#</sup>   |
| Xia         | stage IA/IB<br>25 (T1 + T2),<br>N0  | 25      | all with<br>pathological<br>confirmation   | p, c         | 50 Gy in 5 Gy/f in 2 weeks<br>50 % isodose to PTV edge                           | 100                          | CTV = GTV<br>PTV: GTV + 1 cm                                                    | 3y: 96           |                  | 3y: 91           | 27<br>(24 - 54)             |
| Fritz       | stage IA/IB<br>22 T1 - 18 T2,<br>N0 | 40      | ade 17, scc 8,<br>lc 13, nos 2             | p            | 30 Gy in 1 single fraction, to isocenter, to cover 80 % of PTV, 90 % of GTV      | 30                           | CTV: GTV, ITV: CTV, mid-cycle, inhale, exhale, PTV: ITV + 1 cm axial, 1.5 cm cc | 3y: 81           | 3y: 57           | 3y: 66           | 20<br>(6 - 62)              |
| Onimaru '08 | stage IA/IB<br>13 T1 - 28 T2,<br>N0 | 41      | 30 ade, 10 scc,<br>1 lc                    | p            | 40 Gy in 10 Gy/f or 48 Gy in 12Gy/f, 1 week, to isocenter, Dmin(PTV) = 80 %      | 48 <sup>s</sup>              | CTV = GTV (CT end exhale)+6-8 mm, PTV: CTV+ 0.5 cm                              | 3y: 57           | 3y: 53           | 3y: 47           | 27 <sup>*</sup><br>(9 - 62) |
| Baumann     | stage IA/IB<br>40 T1 - 17 T2,<br>N0 | 57      | 19 ade, 8 scc, 1<br>lc, 10 nos, 19 ns      | ns           | 45 Gy in 15 Gy/f, in median 5 (4-15) days to 67 % isodose to PTV edge            | 66                           | CTV: GTV +2mm<br>PTV: CTV + 0.5-1.0cm axial, 1 cm cc                            | 3y: 92           | 3y: 88           | 3y: 60           | 35<br>(4 - 47)              |
| Brown       | stage IA/IB<br>20 T1 - 11 T2,<br>N0 | 31      | 8 ade, 1 scc,<br>1 ba, 21 nos              | p            | 60 - 67.5 Gy in 3 or 5 fractions, prescribed to the 60-80% isodose line          | 88 <sup>s</sup>              | CTV: GTV + 0.6 cm, PTV: CTV + 0.2 cm, tumor tracking mit CyberKnife             | 3y: 86           |                  | 3y: 84           | 28<br>(24 - 53)             |
| Fakiris     | stage IA/IB<br>34 T1 - 36 T2,<br>N0 | 70      | ns                                         | 22 c<br>48 p | 60 Gy in 20 Gy/f or 66 Gy in 22Gy/f, to 80 % isodose at PTV edge                 | 83 <sup>s</sup>              | CTV = GTV<br>PTV: CTV + 0.5-1 cm axial, 1 cm cc                                 | 3y: 88           | 3y: 82<br>5y: 70 | 3y: 43<br>5y: 17 | 50<br>(1 - 65)              |
| Kopek       | stage IA/IB<br>51 T1 - 36 T2,<br>N0 | 88      | 30 ade, 34 scc,<br>24 nos                  | 62 p<br>26 c | 45 Gy in 15 Gy/f or 67.5 Gy in 22.5 Gy/f to isocenter in 5-8 days, minD(PTV)=67% | 45 <sup>s</sup>              | CTV = GTV<br>PTV: CTV + 0.5 cm axial and 1 cm cc                                | 3y: 89           | 3y: 70           | 3y: 37           | 44<br>(2 - 97)              |
| Stephans    | stage IA/IB<br>42 T1 - 14 T2,<br>N0 | 56      | 9 ade, 20 scc, 7<br>undiff/other, 20<br>ns | p, c         | 50 Gy in 10 Gy/f in 11 (8 - 14) days, 97 - 100 % isodose to PTV egde             | 70                           | ITV: GTV in free breathing, inhale, ex-hale, PTV: ITV + 0.5 cm axial + 1 cm cc  | 3y: 97           |                  | 3y: 50           | 20<br>(2 - 48)              |
| Baba        | T1 87, T2 37                        | 124     | 66 ade, 35 scc,<br>13 nos, 10<br>unproven  | nn           | 48/52 Gy in 12/13 Gy/f in 11 (8 - 14) days, to isocenter, Dmin(95% PTV) =80%     | 48 <sup>s</sup>              | CTV = GTV, ITV: CTV in 3 breathing phases, PTV: ITV + 0.5 cm axial, 1 cm cc     | 3y: 80           |                  |                  | 26 (7 - 66)                 |
| Crabtree    | stage IA/IB<br>57 T1 - 19 T2,<br>N0 | 76      | ns                                         | ns           | 54 Gy in 18 Gy/f, in 8 to 14 days, to the 80 % to 85 % isodose line              | 68                           | ns                                                                              | 3y: 89           | 3y: 67           | 3y: 32           | 19                          |
| Timmerman   | stage IA/IB<br>44 T1 - 11 T2,<br>N0 | 55      | 19 ade, 17 scc,<br>16 nos, 3 lc<br>undiff  | p            | 54 Gy in 18 Gy/f in maximum 2 weeks<br>100 % isodose to PTV edge                 | 79                           | CTV = GTV<br>PTV: CTV + 0.5 cm axial, 1 cm cc                                   | 3y: 98           | 3y: 55           | 3y: 48           | 34<br>(5 - 50)              |
| Videtic     | stage IA/IB<br>22 T1 - 6 T2, N0     | 26      | 13 ade, 4 scc,<br>3 nos, 8 ns              | 25 p<br>3 c  | 50 Gy in 10 Gy/f, 5 days, PTV enclosed by 95 % isodose line, IMRT planning       | 54                           | ITV: GTV in free breathing, exhale, and inhale, PTV: ITV(=CTV) + 0.3-0.5 cm     | 3y: 94           |                  | 3y: 52           | 31<br>(10 - 51)             |
| Andratschke | stage IA/IB<br>31 T1 - 61 T2,       | 92      | 35 ade, 49 scc,<br>2 ba, 6 nos             | 24 c<br>68 p | 24-45 Gy in 3-5 fractions in 5-12 days, to 60 % isodose to PTV edge              | 62 <sup>s</sup>              | CTV = GTV, ITV: CTV in slow CT<br>PTV: ITV + 0.5 cm axial and 1 cm cc           | 3y: 83<br>5y: 83 | 3y: 64<br>5y: 48 | 3y: 38<br>5y: 17 | 21<br>(3 - 87)              |

|                 |                                      |           |                                                           |               |                                                                                 |                 |                                                                             |                                  |                                |                                |                                 |
|-----------------|--------------------------------------|-----------|-----------------------------------------------------------|---------------|---------------------------------------------------------------------------------|-----------------|-----------------------------------------------------------------------------|----------------------------------|--------------------------------|--------------------------------|---------------------------------|
|                 | N0                                   |           |                                                           |               |                                                                                 |                 |                                                                             |                                  |                                |                                |                                 |
| Hamamoto        | stage IA/IB<br>101 T1 - 27 T2,<br>N0 | 128       | ns                                                        | ns            | 48 or 60 Gy in 9.2-14 Gy/f, in 4 to 10 days, to isocenter, Dmin(PTV) = 90 %     | 48 <sup>s</sup> | ITV: GTV with slow CT,<br>PTV: ITV + 0.5 cm                                 | 3y: 85                           |                                |                                | 18<br>(1 - 60)                  |
| Lagerwaard      | stage IA/IB<br>106 T1 - 71 T2,<br>N0 | 177       | 20 ade, 16 scc,<br>24 nos, 117 ns                         | p, c          | 5 × 12 Gy, 3 × 20 Gy, or 8 × 7.5 Gy in 2 weeks, to 80 % isodose at PTV edge     | 75 <sup>s</sup> | CTV = GTV, ITV: GTV from 10 resp. phases, PTV:<br>ITV + 3mm                 | 3y: 93<br>5y: 93                 | 3y: 85<br>5y: 51               |                                | 32                              |
| Shibamoto       | T1 - T2                              |           | 104 ade, 60 scc,<br>16 nos                                | 35 c<br>145 p | dosage depended on size,<br>T1: 48 Gy, T2: 52 Gy                                |                 | CTV = GTV, ITV: CTV in 3 resp. phases<br>PTV: ITV + 0.5 cm axial + 1 cm cc  | 3y: 83<br>5y: 83                 | 3y: 83<br>5y: 69               | 3y: 69<br>5y: 52               | 36 (42 <sup>s</sup> )           |
| Shibamoto<br>d2 | 124 T1, N0                           | 124       |                                                           |               | 48 Gy in 12 Gy/f, in 9 to 21 days, 95 %<br>of the ITV > 94 % of presc. dose     | 48              |                                                                             | 3y: 86                           |                                |                                |                                 |
| Shibamoto<br>d3 | 52 T2, N0                            | 52        |                                                           |               | 52 Gy in 13 Gy/f, in 9 to 21 days, 95 %<br>of the ITV > 94 % of prescribed dose | 52              |                                                                             | 3y: 73                           |                                |                                |                                 |
| Shirata         | stage IA/IB<br>63 T1 - 18 T2,<br>N0  | 80        | 33 ade, 22 scc,<br>5 lc, 20 nos                           |               | prescription to isocenter,<br>Dmin(PTV) = 90 %                                  |                 | CTV: GTV + 0-0.5 cm, PTV: CTV + 0.5-1 cm,<br>individualized margins         | 3y: 89                           | 3y: 97                         | 3y: 90                         | 30<br>(0.3 - 79)                |
| Shirata, d1     |                                      | 45        |                                                           |               | 48 Gy in 12 Gy/f                                                                | 48              |                                                                             | 3y: 100                          |                                |                                |                                 |
| Shirata, d2     |                                      | 29        |                                                           |               | 60 Gy in 7.5 Gy/f                                                               | 60              |                                                                             | 3y: 82                           |                                |                                |                                 |
| Takeda          |                                      |           | ade 64, scc 38,<br>nos 13, ns 58                          | p, c          | in one week, to 80 % isodose at PTV<br>edge                                     |                 | ITV: GTV in slow CT (6-8 s/slice)<br>PTV: ITV + 0.6-0.8 cm (indiv. margins) |                                  |                                |                                |                                 |
| Takeda, d1      | 27 (10 T1 + 17<br>T2)~               | 27        |                                                           |               | 40 Gy in 8 Gy/f                                                                 | 50              |                                                                             | 3y: 72                           |                                |                                | 21<br>(6 - 64)                  |
| Takeda, d2      | 138 (91 T1 + 47<br>T2)~              | 138       |                                                           |               | 50 Gy in 10 Gy/f                                                                | 63              |                                                                             | 3y: 87                           |                                |                                | 21<br>(6 - 64)                  |
| Inoue           | stage IA/IB<br>79 T1 - 30 T2,<br>N0  | 109       | 65 ade, 29 scc,<br>1 lc, 8 nos, 6 ns                      | ns            | 45 Gy in 15 Gy/f or 48 Gy in 12 Gy/f in<br>4 to 7 days, to isocenter            | 48 <sup>s</sup> | CTV: GTV + 5 - 8mm<br>PTV: CTV + 5mm                                        | 3y: 81<br>5y: 78                 | 3y: 69<br>5y: 64               |                                | 25<br>(4 - 72)                  |
| Takeda          | stage IA/IB<br>67 T1 - 42 T2,<br>N0  | 109       | 41 ade, 13 scc,<br>8 nos, 47 ns                           | 34 c<br>75 p  | 40 or 50 Gy in 8 or 10 Gy/f, in 5 days,<br>to 80 % isodose at PTV edge          | 63 <sup>s</sup> | ITV: GTV in slow CT<br>PTV: ITV + 0.6-0.9 cm                                | 3y: 84.4                         | 3y: 71                         | 3y: 54                         | 24<br>(3 - 65)                  |
| Hamaji          | 75 T1, 29 T2                         | 104       | ade: 54, scc: 34,<br>large cell ca 4,<br>others 0, nos 12 | nn            | 48 Gy in 12 Gy/f in 5 days, to isocenter                                        | 48              | ITV= GTV w/ slow CT/4DCT, PTV= ITV + 5mm                                    | 3y: 76.7                         |                                |                                | 43 (6 - 115)                    |
| Rwigema         | 40 Ia, 6 Ib                          | 46        | ade 35, scc 4,<br>adenosquamous<br>2, nos: 5              | 41 p<br>5 c   | 54 Gy in 18 Gy/f in 5 days, to PTV<br>edge                                      | 70              | 4DCT, ITV-MIP 8 phases, PTV=ITV+3mm<br>transv+6mm in long direction         | 3y: 95.5                         |                                |                                | 16.8<br>(0.6 - 38.9)            |
| <b>Median</b>   |                                      | <b>57</b> |                                                           |               |                                                                                 | <b>57.0</b>     |                                                                             | <b>3y: 85.9</b><br><b>5y: 83</b> | <b>3y: 70</b><br><b>5y: 69</b> | <b>3y: 54</b><br><b>5y: 51</b> | <b>27</b><br><b>(0.3 - 115)</b> |

FU: follow-up, §: mean value, \$: median value, ade: adenocarcinoma, scc: squamous cell carcinoma, ba: bronchialveolar, lc: large cell carcinoma, nos: not otherwise specified, undiff: undifferentiated, non-scc: non-squamous cell carcinoma, ns: not specified, #: includes the patients with metastases, &: patients alive at the end of follow-up, p: peripheral, c: central.

Onimaru03: local control for the NSCLC group only, 12 Gy difference in total dose among patients, 17 patients got 48 Gy versus 8 patients who got 60 Gy in total with the same number of

fractions.

Onimaru08: 8 Gy difference in total dose among patients, 13 patients received 40 Gy and 28 patients 48 Gy both with four fractions.

Baba: 8 Gy difference in total dose among patients. All 30 stage IA lesions were treated with 48 Gy, and 12 stage IB lesions were treated with 52 Gy, all in 4 fractions.

Xia: stage I pats 25/43.

Brown: 26 out of 31 patients received 60 Gy, most frequently in 3 fractions (24/31).

Kopek: plus one patient T3 N0. Total dose to isocenter was 45 Gy for 62/88 patients, or 67.5 Gy for 26/88 patients who beared peripheral lesions, all delivered in three fractions.

Andratschke: large cohort with most tumors receiving total doses of 24 - 45 Gy in 3 - 5 fractions.

Hamamoto: large cohort of 128 NSCLC patients, the majority received 48 Gy in 4 fractions.

Lagerwaard: 177 patients in total, 82/177 (46%) got 12 Gy per fraction. Maximal difference in the number of fractions is 5.

Takeda: proportion T1-T2 tumors, via personal communication with the authors.

Table 3: Summary of the models for biologically effective doses calculated at isocenter and PTV edge with a constraint to make the logistic curves approach the coordinate origin; all fit parameter values are provided with standard errors (and 68% CI).

| Model concept and dataset                                 |         | $\alpha/\beta$<br>(std error)<br>[Gy] | $D_t$<br>(std error)<br>[Gy] | TCD <sub>50</sub><br>CI 68%<br>[Gy] | k<br>CI 68%<br>[Gy] | $\gamma_{50}$<br>(std error)<br>[%/%] | AIC     |
|-----------------------------------------------------------|---------|---------------------------------------|------------------------------|-------------------------------------|---------------------|---------------------------------------|---------|
| <b>ISOCENTER</b>                                          |         |                                       |                              |                                     |                     |                                       |         |
| LQ with<br>constraint at<br>(0,0)                         | CF + HF | $\alpha/\beta = 10$                   | -                            | 72.6 (68.2-74.9)*                   | 22.8 (20.1-25.5)*   | 0.79(0.11)                            | -4773.8 |
|                                                           | CF      | $\alpha/\beta = 10$                   | -                            | 71.2 (67-74.9)*                     | 16.4 (12.0-20.8)*   | 1.08(0.36)                            | -267.1  |
|                                                           | HF      | $\alpha/\beta = 10$                   | -                            | 75.9 (71.0-81.0)*                   | 21.5 (17.9-24.8)*   | 0.88(0.17)                            | -2875.8 |
| LQ: free $\alpha/\beta$<br>with<br>constraint at<br>(0,0) | CF + HF | 12.6(10.5-15.0)*                      | -                            | 67.1(62.4-71.7)*                    | 19.3(15.7-23.0)*    | 0.87(0.17)                            | -4780.1 |
|                                                           | CF      | 3.9(2.4-6.6)                          | -                            | 90.8(77.4-110.0)*                   | 18.3(12.7-27.0)     | 1.24(0.59)                            | -270.1  |
| <b>PTV EDGE</b>                                           |         |                                       |                              |                                     |                     |                                       |         |
| LQ with<br>constraint at<br>(0,0)                         | CF + HF | $\alpha/\beta = 10$                   | -                            | 54.6 (51.5-57.6)*                   | 18.3 (16.1-20.6)*   | 0.74(0.12)                            | -4761.9 |
|                                                           | CF      | $\alpha/\beta = 10$                   | -                            | 66.5 (62.7-69.9)*                   | 15.5 (11.6-19.5)*   | 1.07(0.33)                            | -266.8  |
|                                                           | HF      | $\alpha/\beta = 10$                   | -                            | 51.5 (48.3-54.7)*                   | 17.2 (15.1-17.2)*   | 0.75(0.12)                            | -5294.6 |
| LQ: free $\alpha/\beta$<br>with<br>constraint at<br>(0,0) | CF + HF | 5.8(4.7-7.1)*                         | -                            | 69.7(63.1-77.0)*                    | 23.2(19.6-27.5)     | 0.75(0.16)                            | -4764.7 |
|                                                           | CF      | 4.2(2.4-8.0)                          | -                            | 81.3(68.8-99.4)                     | 17.7(12.5-25.5)     | 1.15(0.62)                            | -267.8  |

\* p value < 0.05

Table 4: Doses per fraction at isocenter and PTV edge, calculated according to the information provided in the references (prescription in bold characters).

| Reference                                              | <b>d @ Isocenter</b> | <b>d @ PTV edge</b> | Comment                                                                                                                                                                                                                                                                                                                                       |
|--------------------------------------------------------|----------------------|---------------------|-----------------------------------------------------------------------------------------------------------------------------------------------------------------------------------------------------------------------------------------------------------------------------------------------------------------------------------------------|
| <b>Conventionally fractionated treatment schedules</b> |                      |                     |                                                                                                                                                                                                                                                                                                                                               |
| Kaskowitz 1993                                         | <b>1.8</b>           | 1.7                 | If no minimal dose to the PTV was explicitly reported, it was assumed to be 95% dose, according to ICRU recommendations. This was done for all the conventional treatments. Ratios deviate from 0.95 because of rounding error.                                                                                                               |
| Jeremic 1997                                           | <b>1.2</b>           | 1.1                 |                                                                                                                                                                                                                                                                                                                                               |
| Hayakawa 1999                                          | <b>2</b>             | 1.9                 |                                                                                                                                                                                                                                                                                                                                               |
| Cheung 2002                                            | <b>4</b>             | 3.8                 |                                                                                                                                                                                                                                                                                                                                               |
| Langendijk 2002                                        | <b>2</b>             | 1.9                 |                                                                                                                                                                                                                                                                                                                                               |
| Bradley 2003                                           | <b>1.9</b>           | 1.8                 |                                                                                                                                                                                                                                                                                                                                               |
| Bogart 2005                                            | <b>2.5</b>           | 2.4                 |                                                                                                                                                                                                                                                                                                                                               |
| Zehentmayr 2015                                        | <b>1.8</b>           | 1.7                 |                                                                                                                                                                                                                                                                                                                                               |
| <b>Hypofractionated treatment schedules</b>            |                      |                     |                                                                                                                                                                                                                                                                                                                                               |
| Onimaru 2003                                           | <b>6</b>             | 4.8                 | The dose was prescribed at the isocenter, with the 80% line encompassing the PTV                                                                                                                                                                                                                                                              |
| Xia 2006                                               | 10                   | <b>5</b>            | The 50% isodose line covered 100% PTV, therefore it was assumed that dose at isocenter was twice the prescription                                                                                                                                                                                                                             |
| Fritz 2008                                             | <b>30</b>            | 24                  | The dose prescribed to the isocenter was 30 Gy. Of the prescribed isocenter dose, at least 90% covered the gross tumor volume (GTV = CTV) and at least 80% the PTV.                                                                                                                                                                           |
| Onimaru 2008                                           | <b>12</b>            | 9.6                 | The dose was prescribed at the center of the PTV, aim was the inclusion of the PTV in the 80% isodose                                                                                                                                                                                                                                         |
| Baumann 2009                                           | 22                   | <b>15</b>           | The patients were treated with a dose of 15 Gy times three at about the 67% isodose to the periphery of the PTV, resulting in a central dose of about 22 Gy x 3. More specifically the mean of the maximum dose/fraction to PTV was 22.8 Gy (SD, 3.1 Gy) and the average value of the mean dose/fraction to CTV was 21.6 Gy (SD, 3.0 Gy).     |
| Brown 2009                                             | 29.4                 | <b>20</b>           | A 60-67.5 Gy dose was prescribed to the 60-80% isodose line (median 65%) and given in three to five fractions                                                                                                                                                                                                                                 |
| Fakiris 2009                                           | 27.5                 | <b>22</b>           | The treatment dose was prescribed to the 80% isodose volume                                                                                                                                                                                                                                                                                   |
| Kopek 2009                                             | <b>15</b>            | 10.1                | The prescription dose (45 Gy or 67.5 Gy in three fractions) was delivered to the isocenter. The CTV was encompassed by the 95% isodose surface while the PTV was completely covered by the 67% isodose surface. This corresponds to a minimum dose to the PTV of 30 Gy or 45 Gy in three fractions, depending on the central prescribed dose. |
| Stephans 2009                                          | 14                   | <b>10</b>           | Patients treated to 60 Gy were typically planned using three or more dynamic arcs without heterogeneity corrections prescribed to the 81 to 90% isodose line (as allowed by RTOG 0236).                                                                                                                                                       |
| Baba 2010                                              | <b>12</b>            | 9.6                 | The dose was prescribed at the isocenter; 95% of the PTV was ensured to be covered with at least 80% of the prescribed isocenter dose.                                                                                                                                                                                                        |
| Crabtree 2010                                          | 22.5                 | <b>18</b>           | The dose is typically prescribed to the 80% to 85% isodose line, meaning that the center of the tumor received a dose that is 15% to 20% higher than the prescription.                                                                                                                                                                        |
| Timmerman 2010                                         | 26.3                 | <b>18</b>           | Edge of the PTV, 95% of PTV received 100% of prescribed dose; from Xiao and Papiez related publication: isocenter dose ranges from 71.3 Gy to 88.9 Gy (mean 78.8 Gy, SE 1.1 Gy, ie 26.3 Gy per fraction). This was a s study based on a subset of 20 patients of the RTOG 0236 trial.                                                         |

|                  |             |             |                                                                                                                                                                                                                                                                                                                                                                                                                                                    |
|------------------|-------------|-------------|----------------------------------------------------------------------------------------------------------------------------------------------------------------------------------------------------------------------------------------------------------------------------------------------------------------------------------------------------------------------------------------------------------------------------------------------------|
| Videtic 2010     | 10.8        | <b>10</b>   | Prescription: minimum dose in median to the PTV was 9.9Gy (~10Gy), and max dose in median was 10.8Gy. It was assumed that the dose at the isocenter was similar to the maximum dose inside the PTV (stage I, small tumor volumes).                                                                                                                                                                                                                 |
| Andratschke 2011 | 20.8        | <b>12.5</b> | Doses were prescribed to the 60% isodose covering the planning target volume (PTV)                                                                                                                                                                                                                                                                                                                                                                 |
| Hamamoto 2012    | <b>12</b>   | 10.8        | Leaf margins were arranged so that the 90–95 % isodose line covered the PTV. The dose calculation algorithm was the pencil beam method; this algorithm did not use heterogeneity correction. In SBRT, 48–60 Gy in 4–5 fractions was delivered to the isocenter                                                                                                                                                                                     |
| Lagerwaard 2012  | 15          | <b>12</b>   | All fractionation schemes used were prescribed to the encompassing 80% isodose                                                                                                                                                                                                                                                                                                                                                                     |
| Shibamoto d2     | <b>12</b>   | 9.6         | The prescribed dose represented the dose delivered to the isocenter. It was recommended to cover 95% of the PTV with at least 90% of the isocenter dose; in all patients, 95% of the PTV received at least 80% of the prescribed dose. Consequently, 95% of the ITV was covered with 94% of the prescribed dose in all but 1 patient.                                                                                                              |
| Shibamoto d3     | <b>13</b>   | 10.4        |                                                                                                                                                                                                                                                                                                                                                                                                                                                    |
| Shirata 2012 d1  | <b>12</b>   | 10.8        | The target reference point was defined as the center of the PTV, and the dose was prescribed for its point. PTV was encompassed by the minimum 90% dose line of the reference point dose as possible.                                                                                                                                                                                                                                              |
| Shirata 2012 d2  | <b>7.5</b>  | 6.8         |                                                                                                                                                                                                                                                                                                                                                                                                                                                    |
| Takeda 2012 d1   | <b>10</b>   | 8           | The prescribed dose was defined as 80% of the maximal dose and its isodose line encompassed the PTV surface. Then the median D95 was consistent with the prescribed dose. For peripheral tumors, a total of 50 Gy/5 fractions/ 5 days was prescribed. For tumors adjacent to critical organs such as trachea, main bronchus, pulmonary artery and esophagus, the total dose was decreased to 40 Gy/5 fractions/ 5 days.                            |
| Takeda 2012 d2   | <b>12.5</b> | 10          |                                                                                                                                                                                                                                                                                                                                                                                                                                                    |
| Inoue 2013       | <b>12</b>   | 9.6         | Using a superposition algorithm, they administered 48 Gy in 4 fractions at the isocenter in 2005–2006 (n = 30) and 40 Gy in 4 fractions to the 95% volume of PTV in 2007–2010 (n = 79) with a treatment period of 4 to 7 days. Isocenter dose of 40 Gy in 4 fractions to the 95% volume of PTV was approximately ranged from 45 to 50 Gy. Therefore it was used 12 Gy at isocenter and 9.6 Gy (80%) at edge. Good approximation (min dose 38.4 Gy) |
| Takeda 2013      | 12.5        | <b>10</b>   | 80% isodose of the maximum dose at PTV periphery                                                                                                                                                                                                                                                                                                                                                                                                   |
| Hamaji 2015      | <b>12</b>   | 9.6         | Prescription to the isocenter, it was not specified which isodose line surrounds the PTV. It was assumed the 80%.                                                                                                                                                                                                                                                                                                                                  |
| Rwigema 2015     | 23.4        | <b>18</b>   | To PTV edge, coverage at 95% of PTV normalized to prescription dose. Heterogeneity in PTV of 15-40%                                                                                                                                                                                                                                                                                                                                                |



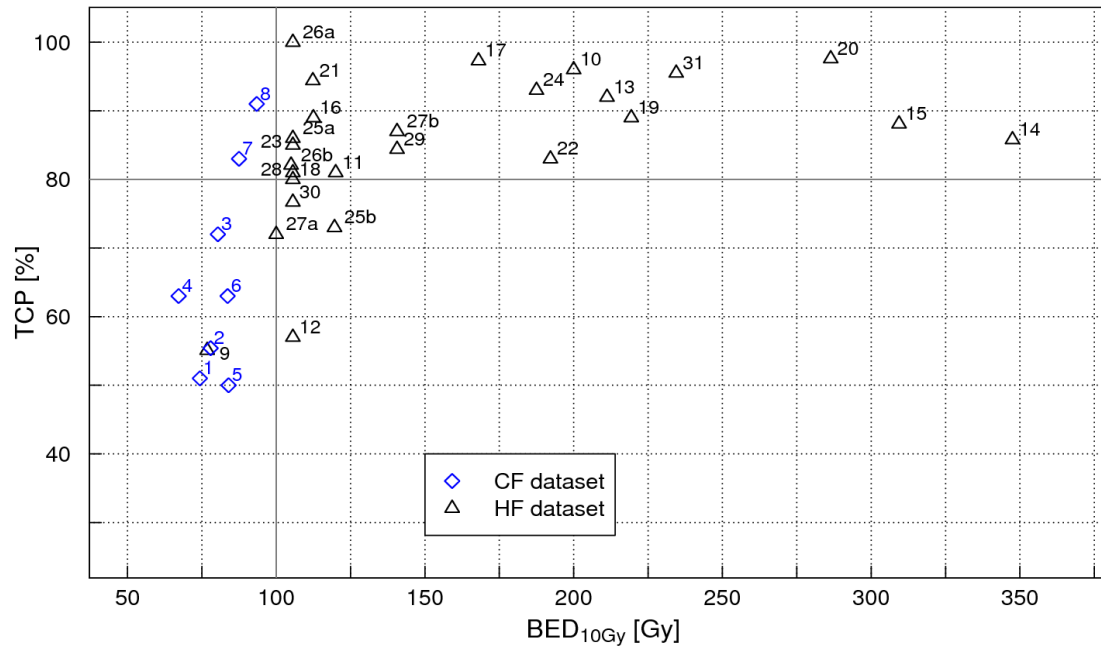

Figure 1: Local control of the conventionally fractionated dataset (blue) and hypofractionated dataset (black) versus BED<sub>10</sub> calculated at the isocenter, with reference numbers.
